# Supplementary material for: Design and Development of an Antigen Test for SARS-CoV-2 Nucleocapsid Protein to Validate the Viral Quality Assurance Panels
Source: MDPI journal article supplement (doi:10.3390/v16050662), 2024-04-24
Supplement: s1 [file s1]

## Supplementary Materials

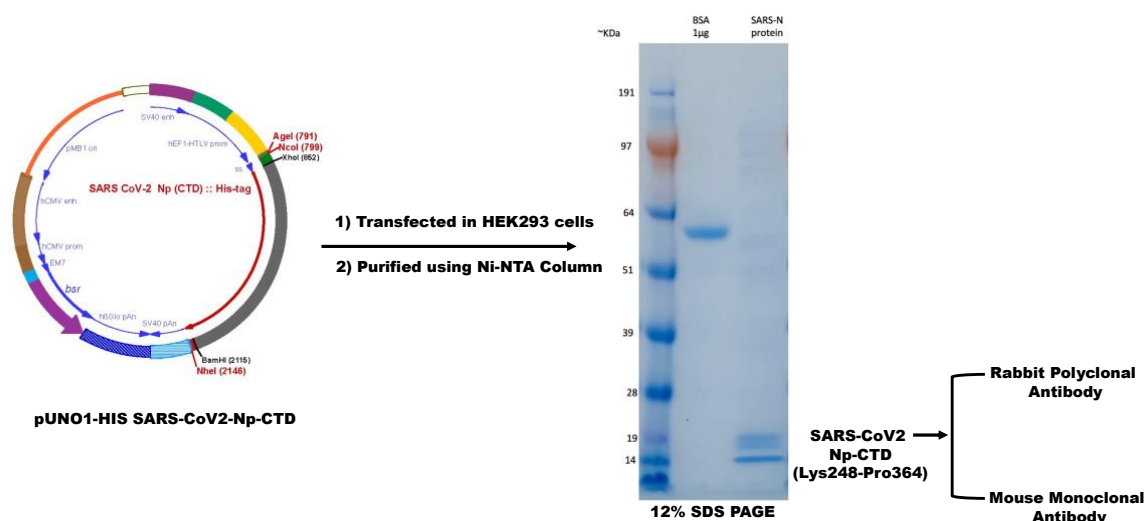

**Figure S1. Cloning, Expression, and purification of Nucleoprotein (Np) C-terminal domain**

**(CTD):** The ORF corresponding to the Np-CTD (Lys248- Pro364) was cloned into the vector pUNO1-HIS vector. The cloned vector pUNO1-HIS SARS-CoV-2-Np-CTD was transfected to the mammalian HEK293 cells for protein expression. The Histidine-tagged Np-CTD protein secreted in the cell-conditioned media was purified using Ni-NTA columns. The purified proteins were resolved on the SDS-PAGE to check the purity and yield of the Np-CTD. A major polypeptide band corresponding to the molecular weight of 14 kDa was detected on the Coomassie-stained SDS-PAGE gels; the higher migrating bands are the post-translational modified Np-CTD. Purified Np-CTD was injected in rabbits and mice to produce polyclonal and monoclonal antibodies.

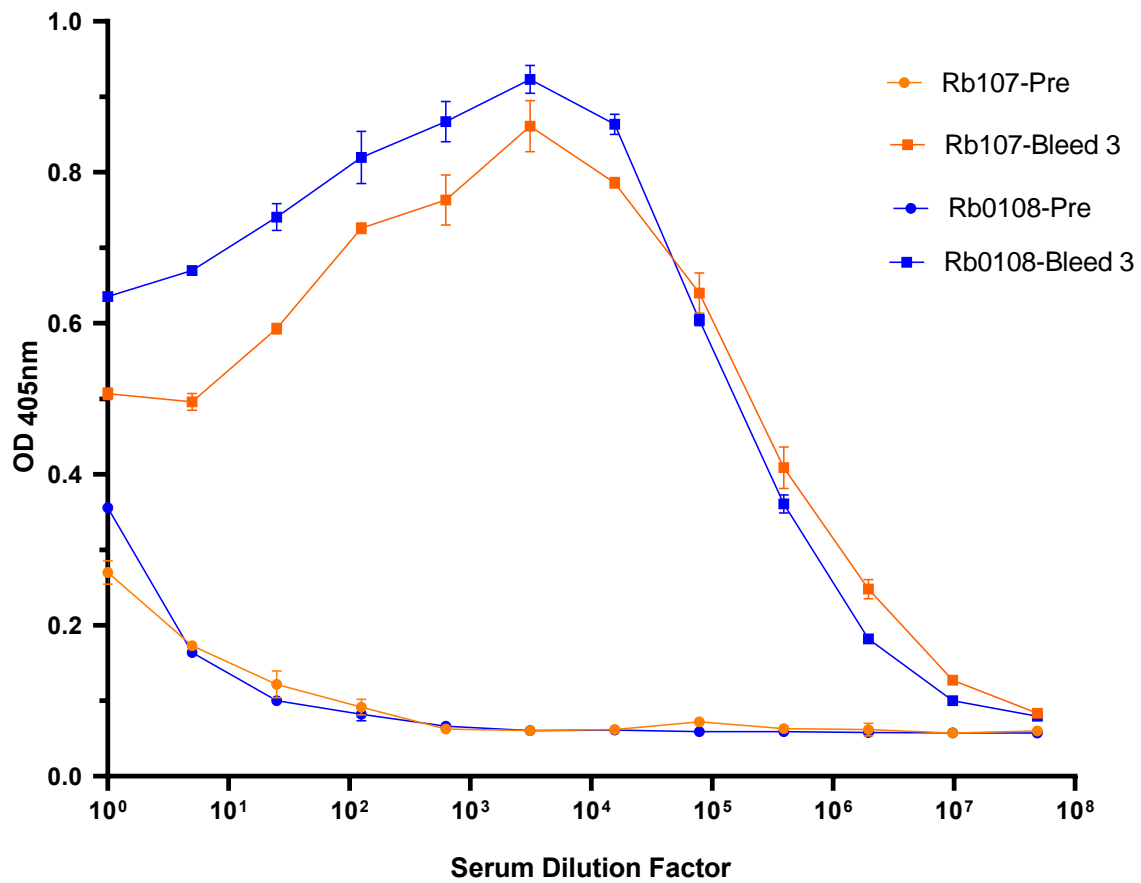

**Figure S2. Production of Np-CTD rabbit polyclonal antibody:** The purified Np-CTD antigen was injected into two rabbits (Rb 107 and 108) to produce the polyclonal antibodies. The serum collected pre- and post-immunization (Bleed 3) from the animals was tested by ELISA using the purified Np-CTD proteins. Both Rb-107 and Rb-108 demonstrated very high antibody titer compared to the pre-immunized serum. Rb-108 polyclonal Ab was selected to develop the subsequent sandwich ELISA.

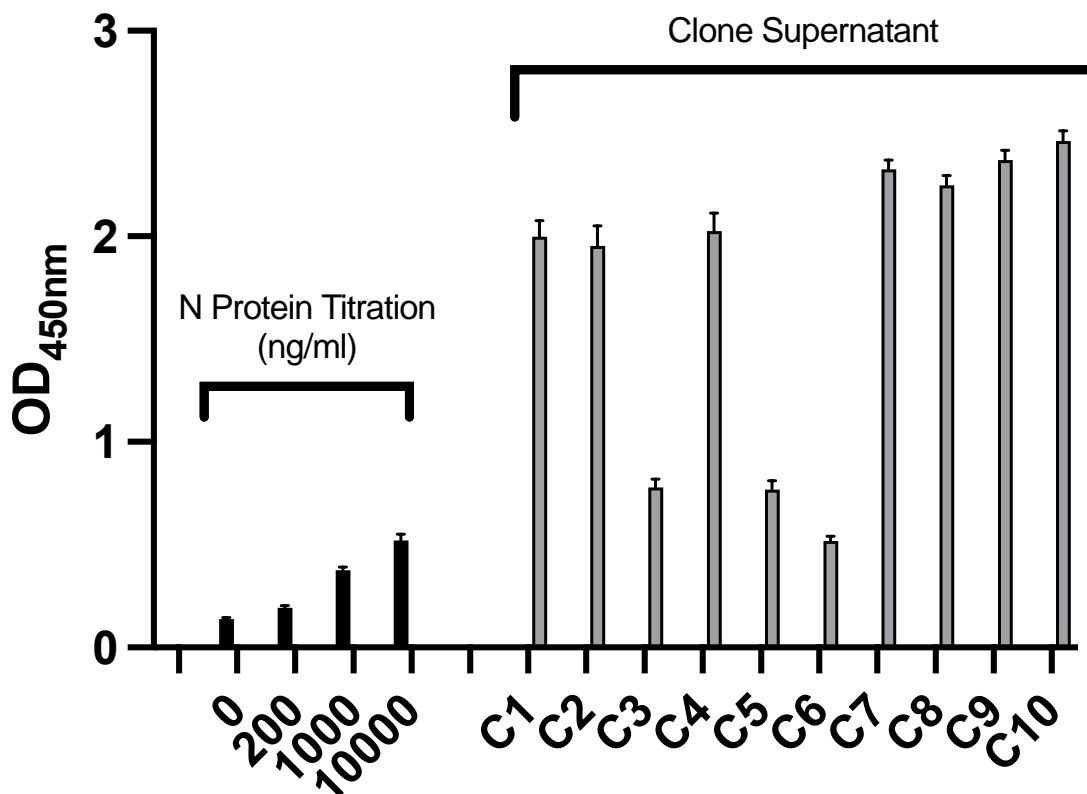

**Figure S3. Production of Np-CTD mouse monoclonal antibody:** The hybridoma clones' supernatant (C1-C10) obtained from the mouse injected with the purified Np-CTD antigen was tested by ELISA using the purified Np proteins. Clones 9 and 10 demonstrated the highest reactivity in ELISA, and the purified monoclonal antibodies mAb 9 and mAb 10 from these clones were selected to develop the subsequent sandwich ELISA. The purified Np was titrated at the indicated concentrations (ng/ml) in parallel for positive control.

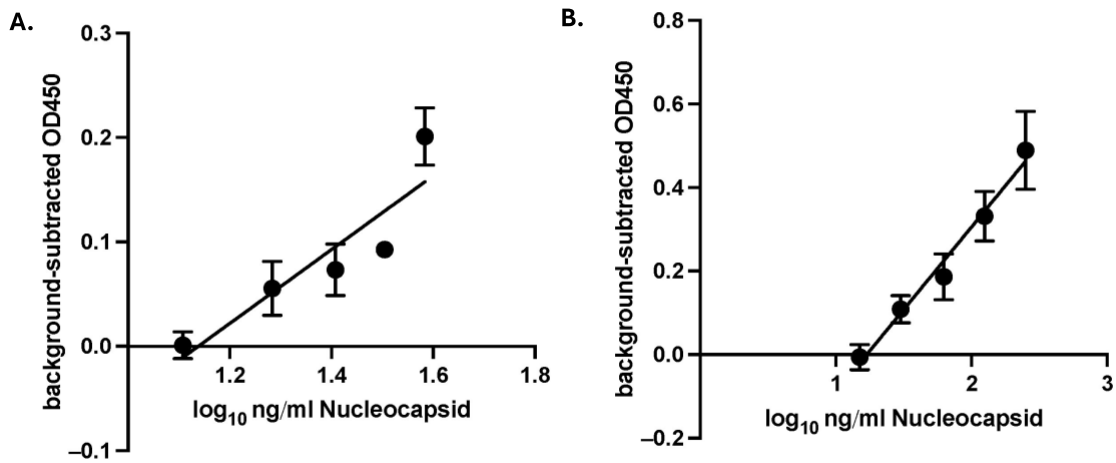

**Figure S4. Estimating ELISA's Limit of Detection (LoD) for UV-inactivated SARS-CoV-2**

**XBB.1.5:** A dilution series of UV-inactivated SARS-CoV-2 XBB.1.5 was prepared in viral transport media and stored at -80°C. **A.** Samples were prepared in triplicate and measured by ELISA using antibodies by a blinded experimenter. **B.** Recombinant N protein was serially diluted and included in the ELISA in **A.** Graphs are mean  $\pm$  SD of triplicate samples. OD values of blanks were subtracted, and the best-fit line was calculated on log-transformed concentrations in GraphPad Prism 10.

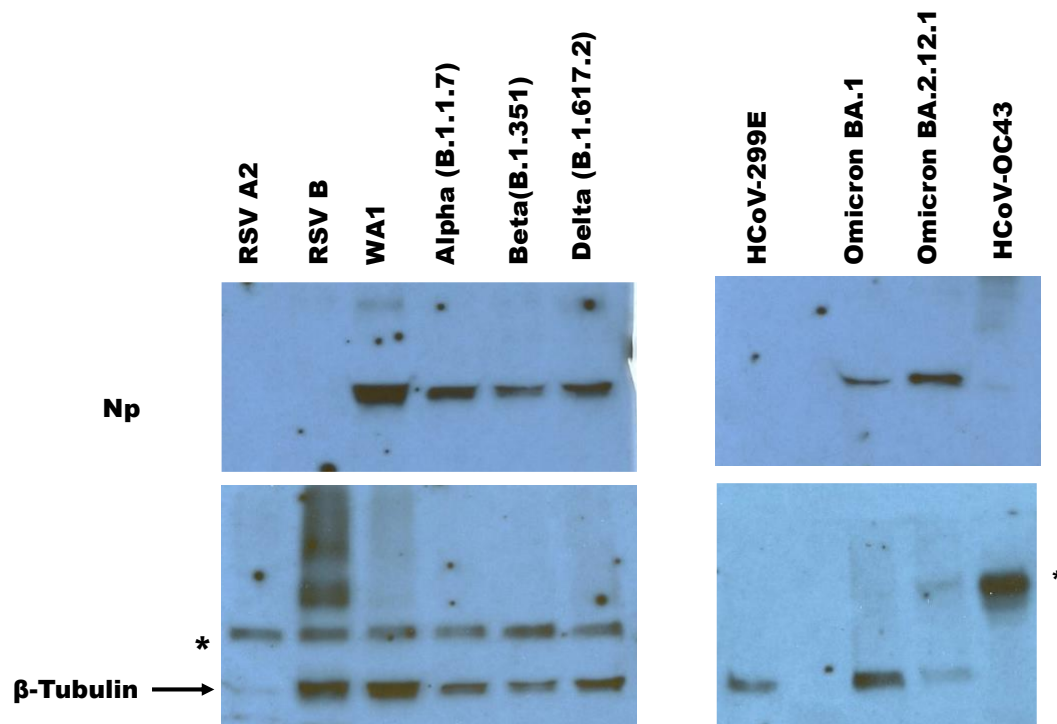

**Figure S5. Western blot to check the specificity of the antibody:** The UV-inactivated SARS-CoV-2 variants (WA1, B.1.1.7, B.1.351, B.1.617.2, BA.1, BA.2.12.1) and other distractor respiratory viruses (HCoV-OC43, HCoV-299E, RSV A2, RSV B) were resolved in SDS-PAGE and subjected to the Western blot assay using mAb10. Single polypeptide bands corresponding to the molecular weight of Np (~45 kDa) were only detected with the SARS-CoV-2 variants. No bands were detected for the distractor viruses. Beta-tubulin was used as the loading control; the higher migrating bands indicated by Asterix are the tubulin dimer.

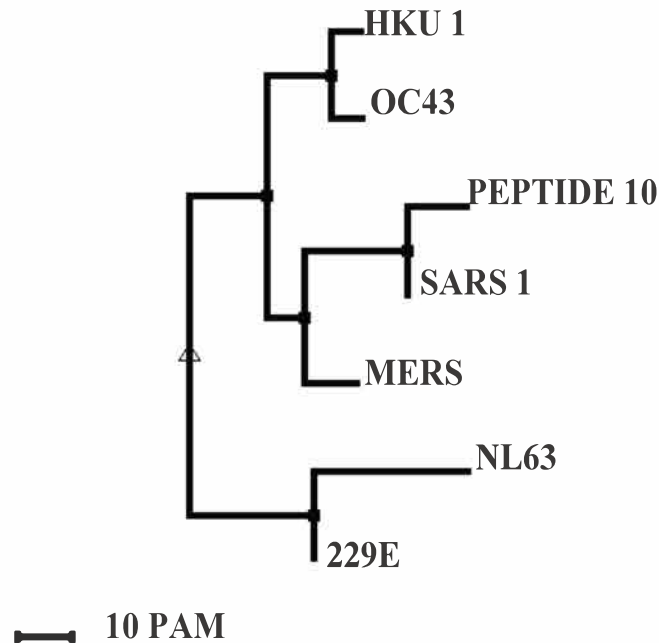

**Figure S6: Phenogram display from the sequence alignment of monoclonal antibody epitope**

**against Nucleocapsid proteins of other Coronaviruses:** Multiple sequence alignment with hierarchical clustering was performed for the mAb9 and mAb10 epitope (peptide#10) against the Nucleocapsid protein sequence of Human coronaviruses (HKU1, OC43, NL63, 229E), Middle East Respiratory Syndrome (MERS), and Severe acute respiratory syndrome coronavirus 1 (SARS 1) using Multalin version 5.4.1. The minimum distance between sequences in this Phenogram in Point Accepted Mutation (PAM) is set at 20.

| mAb 9       | Experiment 1 | Experiment 2 | Average | SD    |
|-------------|--------------|--------------|---------|-------|
| Slope       | 0.125        | 0.050        | 0.088   | 0.053 |
| SD of Blank | 0.008        | 0.002        | 0.005   | 0.004 |
| LOD (ng/ml) | 2.048        | 1.310        | 1.679   | 0.522 |
| LOD (nMol)  | 0.044        | 0.028        | 0.036   | 0.011 |
| LOQ (ng/ml) | 0.621        | 0.397        | 0.509   | 0.158 |
| LOQ (nMol)  | 0.013        | 0.009        | 0.011   | 0.003 |

| mAb 10      | Experiment 1 | Experiment 2 | Average | SD    |
|-------------|--------------|--------------|---------|-------|
| Slope       | 0.125        | 0.154        | 0.140   | 0.020 |
| SD of Blank | 0.001        | 0.007        | 0.004   | 0.004 |
| LOD (ng/ml) | 0.391        | 1.377        | 0.884   | 0.697 |
| LOD (nMol)  | 0.008        | 0.030        | 0.019   | 0.015 |
| LOQ (ng/ml) | 1.185        | 4.589        | 2.887   | 2.407 |
| LOQ (nMol)  | 0.026        | 0.100        | 0.063   | 0.052 |

Table S1: Limit of Detection (LoD) and Limit of Quantitation (LoQ) for RADx-ELISA.
